# Supplementary material for: Single Snapshot Imaging of Optical Properties (SSOP) for Perfusion Assessment during Gastric Conduit Creation for Esophagectomy: An Experimental Study on Pigs
Source: MDPI journal article supplement (doi:10.3390/cancers13236079), 2021-12-02
Supplement: s1 [file s1]

# Single Snapshot Imaging of Optical Properties (SSOP) for Perfusion Assessment during Gastric Conduit Creation for Esophagectomy: An Experimental Study on Pigs

Lorenzo Cinelli, Eric Felli, Luca Baratelli, Silvère Ségaud, Andrea Baiocchi, Nariaki Okamoto, María Rita Rodríguez-Luna, Ugo Elmore, Riccardo Rosati, Stefano Partelli, Jacques Marescaux, Sylvain Gioux and Michele Diana

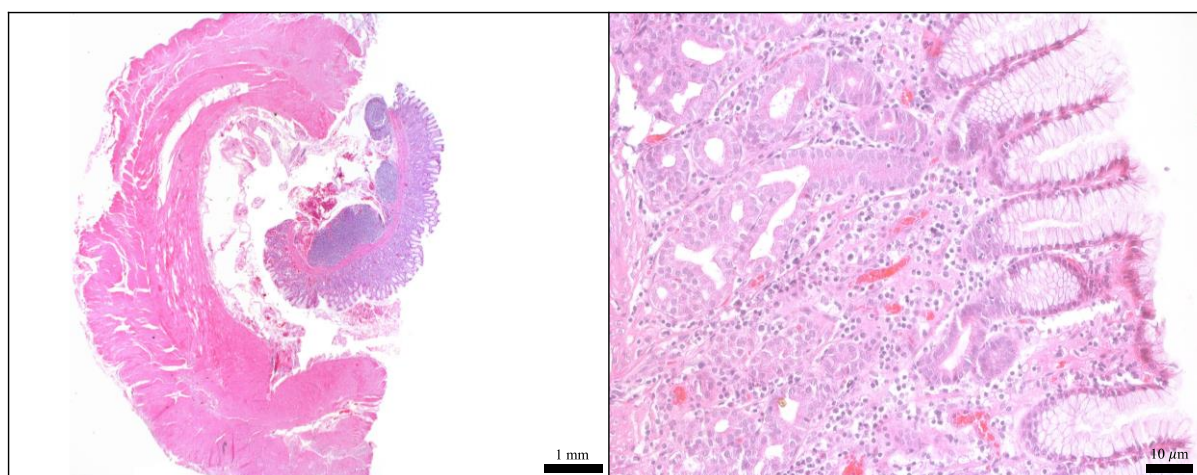

**Figure S1.** Control biopsy of the stomach (T0). Hematoxylin and Eosin staining of ROI-R (Fig 1) before the tubulization (T0). Both full thickness (left) and mucosae (right) magnification show no alteration of the tissue before surgery.

**A**

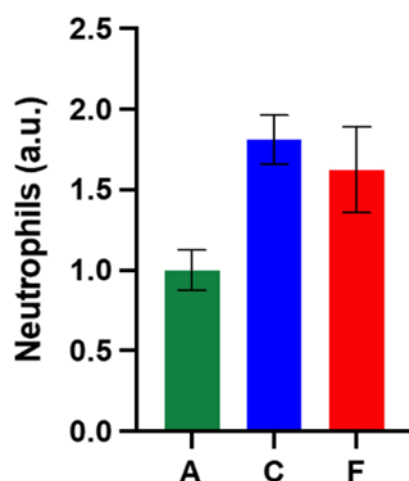

**B**

|                    | A      | C      | F      |
|--------------------|--------|--------|--------|
| Number of values   | 6      | 6      | 6      |
| Minimum            | 0.3750 | 1.500  | 0.7500 |
| 25% Percentile     | 0.9375 | 1.500  | 1.031  |
| Median             | 1.125  | 1.688  | 1.688  |
| 75% Percentile     | 1.125  | 2.250  | 2.063  |
| Maximum            | 1.125  | 2.250  | 2.625  |
| Mean               | 1.000  | 1.813  | 1.625  |
| Std. Deviation     | 0.3062 | 0.3687 | 0.6567 |
| Std. Error of Mean | 0.1250 | 0.1505 | 0.2681 |
| Lower 95% CI       | 0.6787 | 1.426  | 0.9358 |
| Upper 95% CI       | 1.321  | 2.199  | 2.314  |

A = antrum (ROI-A)  
C = corpus (ROI-C)  
F = fundus (ROI-F)

**Figure S2.** Neutrophils distribution (A) and quantification (B). The overall neutrophils number in corpus and fundus was 81.3% and 62.5% higher than antrum, respectively. Data are expressed as mean and  $\pm$  SEM and normalized for ROI-A.

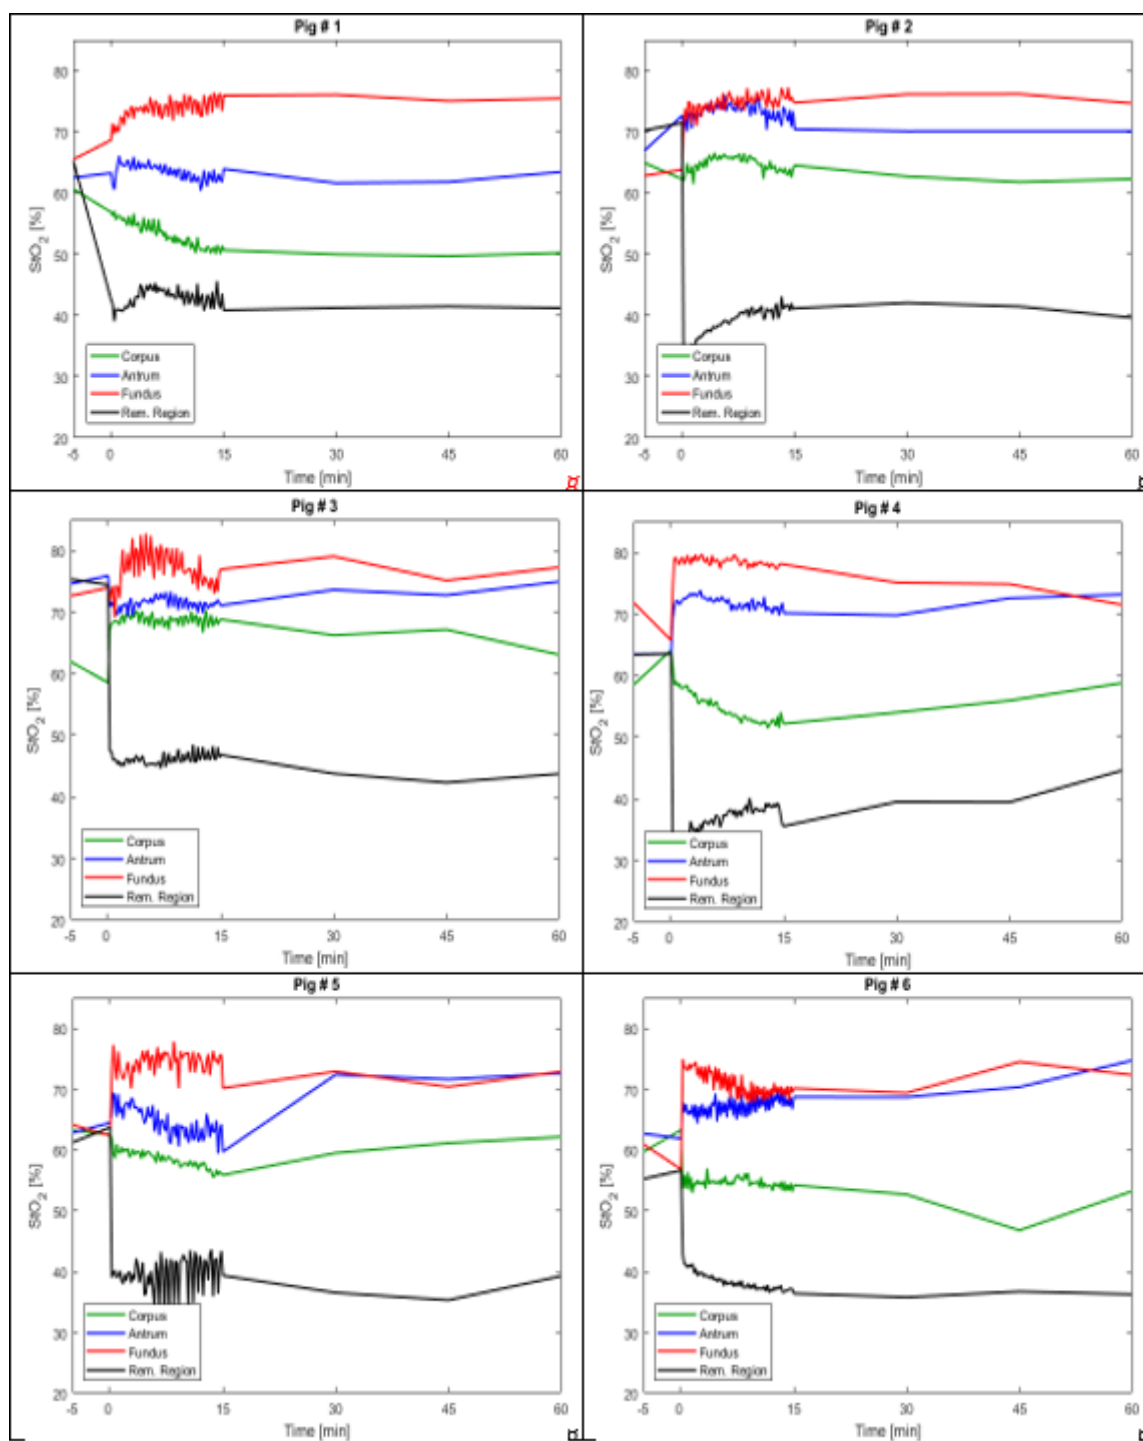

**Figure S3.** StO<sub>2</sub>% curves of all pigs. StO<sub>2</sub>% measurements at ROI-R (black) are lower than ROI-A (green), ROI-C (corpus) and ROI-F (fundus) at T15, T30, T45, and T60. Instead, after GC completion, StO<sub>2</sub>% values increase from corpus to fundus.
