# Supplementary material for: Single Snapshot Imaging of Optical Properties (SSOP) for Perfusion Assessment during Gastric Conduit Creation for Esophagectomy: An Experimental Study on Pigs
Source: Cancers (Basel). 2021 Dec 2;13(23):6079. doi: 10.3390/cancers13236079 (PMC8656795; doi:10.3390/cancers13236079)
Supplement: Supplementary file 1 [file cancers-13-06079-s001.zip]

Archive with 5 entries (5 files):
- cancers-1476082 supplementary.pdf
- Table S1.xlsx
- Table S2.xlsx
- Table S3.xlsx
- Table S4.xlsx
