# Supplementary material for: Single Snapshot Imaging of Optical Properties (SSOP) for Perfusion Assessment during Gastric Conduit Creation for Esophagectomy: An Experimental Study on Pigs
Source: Cancers (Basel). 2021 Dec 2;13(23):6079. doi: 10.3390/cancers13236079 (PMC8656795; doi:10.3390/cancers13236079)
Supplement: Supplementary file 1 [file cancers-13-06079-s001.zip › Table S1.xlsx]

## Sheet: Sheet1
pH		T0	T15	T30	T45	T60
	Mean	1	1.001	1.001	1.002	1.001
	Std. Error of Mean	0.001921	0.001754	0.001754	0.001733	0.002264
	Dunnett's multiple comparisons test	Mean Diff,	95,00% CI of diff,	Adjusted P Value
	0 vs. 15	-0.001359	-0,004086 to 0,001368	0.3504
	0 vs. 30	-0.001359	-0,004346 to 0,001628	0.4137
	0 vs. 45	-0.001585	-0,004423 to 0,001253	0.2765
	0 vs. 60	-0.0009058	-0,005884 to 0,004073	0.9142
pCO2		T0	T15	T30	T45	T60
	Mean	1	0.9439	0.9361	0.9801	0.9953
	Std. Error of Mean	0.02528	0.04303	0.04587	0.003126	0.03113
	Dunnett's multiple comparisons test	Mean Diff,	95,00% CI of diff,	Adjusted P Value
	0 vs. 15	0.05606	-0,06330 to 0,1754	0.3911
	0 vs. 30	0.06394	-0,09896 to 0,2268	0.5195
	0 vs. 45	0.01985	-0,06439 to 0,1041	0.8267
	0 vs. 60	0.004672	-0,05201 to 0,06136	0.9942
pO2		T0	T15	T30	T45	T60
	Mean	1	1.043	1.143	1.131	1.098
	Std. Error of Mean	0.05366	0.05131	0.04325	0.07504	0.05786
	Dunnett's multiple comparisons test	Mean Diff,	95,00% CI of diff,	Adjusted P Value
	0 vs. 15	-0.04316	-0,1315 to 0,04523	0.3642
	0 vs. 30	-0.1429	-0,2630 to -0,02282	0.0259
	0 vs. 45	-0.1308	-0,2387 to -0,02276	0.0242
	0 vs. 60	-0.09783	-0,1443 to -0,05134	0.0022
HCO3-		T0	T15	T30	T45	T60
	Mean	1	0.982	0.9905	1.003	0.9995
	Std. Error of Mean	0.02545	0.04099	0.04376	0.01103	0.009906
	Dunnett's multiple comparisons test	Mean Diff,	95,00% CI of diff,	Adjusted P Value
	0 vs. 15	0.01801	-0,1257 to 0,1617	0.9738
	0 vs. 30	0.009534	-0,1545 to 0,1736	0.9983
	0 vs. 45	-0.003178	-0,1156 to 0,1092	0.9999
	0 vs. 60	0.0005297	-0,08727 to 0,08833	>0,9999
Systemic lactates		T0	T15	T30	T45	T60
	Mean	1	1.111	1.136	1.182	1.204
	Std. Error of Mean	0.1134	0.07505	0.0855	0.119	0.1038
	Dunnett's multiple comparisons test	Mean Diff,	95,00% CI of diff,	Adjusted P Value
	0 vs. 15	-0.111	-0,2503 to 0,02826	0.1071
	0 vs. 30	-0.1359	-0,3925 to 0,1207	0.3101
	0 vs. 45	-0.1815	-0,3285 to -0,03453	0.0224
	0 vs. 60	-0.2044	-0,3800 to -0,02872	0.0283
BE(a)		T0	T15	T30	T45	T60
	Mean	1	0.9227	1.036	1.036	1.011
	Std. Error of Mean	0.1474	0.2212	0.1856	0.08642	0.073
	Dunnett's multiple comparisons test	Mean Diff,	95,00% CI of diff,	Adjusted P Value
	0 vs. 15	0.07735	-0,7151 to 0,8698	0.9891
	0 vs. 30	-0.03591	-0,7287 to 0,6568	0.999
	0 vs. 45	-0.03591	-0,6719 to 0,6000	0.9985
	0 vs. 60	-0.01105	-0,5606 to 0,5385	>0,9999
BE(b)		T0	T15	T30	T45	T60
	Mean	1	0.9013	1.026	1.023	0.9836
	Std. Error of Mean	0.1576	0.2135	0.1785	0.1074	0.08655
	Dunnett's multiple comparisons test	Mean Diff,	95,00% CI of diff,	Adjusted P Value
	0 vs. 15	0.09868	-0,7036 to 0,9010	0.9754
	0 vs. 30	-0.02632	-0,6895 to 0,6369	0.9998
	0 vs. 45	-0.02303	-0,6740 to 0,6280	0.9998
	0 vs. 60	0.01645	-0,5607 to 0,5936	0.9999
CsO2		T0	T15	T30	T45	T60
	Mean	1	1.023	1.05	1.035	1.034
	Std. Error of Mean	0.02777	0.02244	0.01463	0.03011	0.02533
	Dunnett's multiple comparisons test	Mean Diff,	95,00% CI of diff,	Adjusted P Value
	0 vs. 15	-0.02298	-0,05895 to 0,01299	0.2006
	0 vs. 30	-0.05015	-0,1233 to 0,02297	0.1661
	0 vs. 45	-0.03457	-0,07627 to 0,007141	0.0947
	0 vs. 60	-0.03437	-0,06738 to -0,001347	0.0432
Na++		T0	T15	T30	T45	T60
	Mean	1	1.011	1.008	1.001	0.9988
	Std. Error of Mean	0.01138	0.01079	0.01511	0.011	0.01063
	Dunnett's multiple comparisons test	Mean Diff,	95,00% CI of diff,	Adjusted P Value
	0 vs. 15	-0.0108	-0,03478 to 0,01317	0.4203
	0 vs. 30	-0.008403	-0,04035 to 0,02354	0.7746
	0 vs. 45	-0.0012	-0,01479 to 0,01239	0.9924
	0 vs. 60	0.0012	-0,01641 to 0,01881	0.9971
K+		T0	T15	T30	T45	T60
	Mean	1	1.071	1.108	1.146	1.179
	Std. Error of Mean	0.04351	0.0716	0.08392	0.04567	0.05742
	Dunnett's multiple comparisons test	Mean Diff,	95,00% CI of diff,	Adjusted P Value
	0 vs. 15	-0.0709	-0,2752 to 0,1335	0.6064
	0 vs. 30	-0.1082	-0,3420 to 0,1256	0.4016
	0 vs. 45	-0.1455	-0,2738 to -0,01725	0.0313
	0 vs. 60	-0.1791	-0,3124 to -0,04581	0.0159
Ca++		T0	T15	T30	T45	T60
	Mean	1	0.9535	0.951	0.9736	0.9887
	Std. Error of Mean	0.02066	0.01683	0.02371	0.02664	0.01525
	Dunnett's multiple comparisons test	Mean Diff,	95,00% CI of diff,	Adjusted P Value
	0 vs. 15	0.04648	-0,05464 to 0,1476	0.4063
	0 vs. 30	0.04899	-0,07968 to 0,1777	0.5414
	0 vs. 45	0.02638	-0,05388 to 0,1066	0.6428
	0 vs. 60	0.01131	-0,05350 to 0,07611	0.9242
Cl-		T0	T15	T30	T45	T60
	Mean	1	1.015	1.026	1.012	1.007
	Std. Error of Mean	0.02108	0.01571	0.02578	0.01937	0.01765
	Dunnett's multiple comparisons test	Mean Diff,	95,00% CI of diff,	Adjusted P Value
	0 vs. 15	-0.01485	-0,07158 to 0,04188	0.7771
	0 vs. 30	-0.0264	-0,09787 to 0,04506	0.5627
	0 vs. 45	-0.01155	-0,05723 to 0,03412	0.7944
	0 vs. 60	-0.006601	-0,05418 to 0,04098	0.9631
tCO2		T0	T15	T30	T45	T60
	Mean	1	0.9803	0.9888	1.001	0.9979
	Std. Error of Mean	0.02413	0.03939	0.04168	0.01005	0.009977
	Dunnett's multiple comparisons test	Mean Diff,	95,00% CI of diff,	Adjusted P Value
	0 vs. 15	0.01974	-0,1144 to 0,1538	0.9554
	0 vs. 30	0.01121	-0,1428 to 0,1652	0.9963
	0 vs. 45	-0.0005336	-0,1066 to 0,1056	>0,9999
	0 vs. 60	0.002134	-0,08119 to 0,08546	0.9999
Htc		T0	T15	T30	T45	T60
	Mean	1	1.098	1.11	1.129	1.123
	Std. Error of Mean	0.06545	0.09235	0.09186	0.05263	0.05096
	Dunnett's multiple comparisons test	Mean Diff,	95,00% CI of diff,	Adjusted P Value
	0 vs. 15	-0.09816	-0,2719 to 0,07562	0.2696
	0 vs. 30	-0.1104	-0,3369 to 0,1161	0.3653
	0 vs. 45	-0.1288	-0,2557 to -0,001946	0.0473
	0 vs. 60	-0.1227	-0,2654 to 0,02005	0.0842
cHb		T0	T15	T30	T45	T60
	Mean	1	1.092	1.11	1.13	1.134
	Std. Error of Mean	0.06721	0.09272	0.09311	0.05311	0.05274
	Dunnett's multiple comparisons test	Mean Diff,	95,00% CI of diff,	Adjusted P Value
	0 vs. 15	-0.09206	-0,2598 to 0,07568	0.2873
	0 vs. 30	-0.1101	-0,3263 to 0,1060	0.3355
	0 vs. 45	-0.13	-0,2671 to 0,007166	0.0605
	0 vs. 60	-0.1336	-0,2763 to 0,009183	0.0632
Glu		T0	T15	T30	T45	T60
	Mean	1	0.9427	0.9466	1.011	0.9771
	Std. Error of Mean	0.1485	0.1632	0.1735	0.215	0.2111
	Dunnett's multiple comparisons test	Mean Diff,	95,00% CI of diff,	Adjusted P Value
	0 vs. 15	0.05725	-0,06392 to 0,1784	0.387
	0 vs. 30	0.05344	-0,2030 to 0,3099	0.8742
	0 vs. 45	-0.01145	-0,2878 to 0,2649	0.9997
	0 vs. 60	0.0229	-0,2280 to 0,2738	0.9914
BUN		T0	T15	T30	T45	T60
	Mean	1	0.9427	0.9466	1.011	0.9771
	Std. Error of Mean	0.1485	0.1632	0.1735	0.215	0.2111
	Dunnett's multiple comparisons test	Mean Diff,	95,00% CI of diff,	Adjusted P Value
	0 vs. 15	0.05725	-0,06392 to 0,1784	0.387
	0 vs. 30	0.05344	-0,2030 to 0,3099	0.8742
	0 vs. 45	-0.01145	-0,2878 to 0,2649	0.9997
	0 vs. 60	0.0229	-0,2280 to 0,2738	0.9914
Urea		T0	T15	T30	T45	T60
	Mean	1	1.218	1.277	1.317	1.317
	Std. Error of Mean	0.2267	0.2909	0.3227	0.3291	0.327
	Dunnett's multiple comparisons test	Mean Diff,	95,00% CI of diff,	Adjusted P Value
	0 vs. 15	-0.2178	-0,4880 to 0,05231	0.1033
	0 vs. 30	-0.2772	-0,7158 to 0,1614	0.2061
	0 vs. 45	-0.3168	-0,7217 to 0,08808	0.1134
	0 vs. 60	-0.3168	-0,7111 to 0,07740	0.1044
Crea		T0	T15	T30	T45	T60
	Mean	1	1.025	1.096	1.11	0.9821
	Std. Error of Mean	0.1498	0.1543	0.1332	0.09835	0.2231
	Dunnett's multiple comparisons test	Mean Diff,	95,00% CI of diff,	Adjusted P Value
	0 vs. 15	-0.02548	-0,3679 to 0,3169	0.9961
	0 vs. 30	-0.09582	-0,5700 to 0,3783	0.8843
	0 vs. 45	-0.1101	-0,4458 to 0,2256	0.6444
	0 vs. 60	0.01794	-0,7438 to 0,7796	0.9999
