# Supplementary material for: Single Snapshot Imaging of Optical Properties (SSOP) for Perfusion Assessment during Gastric Conduit Creation for Esophagectomy: An Experimental Study on Pigs
Source: Cancers (Basel). 2021 Dec 2;13(23):6079. doi: 10.3390/cancers13236079 (PMC8656795; doi:10.3390/cancers13236079)
Supplement: Supplementary file 1 [file cancers-13-06079-s001.zip › Table S2.xlsx]

## Sheet: Sheet1
Mucosae		Antrum	Corpus	Fundus	Removed Region
	Mean	1	1.909	1.455	2.455
	Std. Error of Mean	0.1676	0.2335	0.23	0.2335
	Dunnett's multiple comparisons test	Mean Diff,	95,00% CI of diff,	Adjusted P Value
	Antrum vs Corpus	-0.9091	-1,692 to -0,1259	0.0211
	Antrum vs Fundus	-0.4545	-1,238 to 0,3287	0.3433
	Antrum vs Removed region	-1.455	-2,238 to -0,6713	0.0004
Sub-Mucosae		Antrum	Corpus	Fundus	Removed Region
	Mean	1	1.429	2.571	2.286
	Std. Error of Mean	0.1429	0.2857	0.2213	0.3614
	Dunnett's multiple comparisons test	Mean Diff,	95,00% CI of diff,	Adjusted P Value
	Antrum vs Corpus	-0.4286	-1,382 to 0,5248	0.5384
	Antrum vs Fundus	-1.571	-2,525 to -0,6181	0.0013
	Antrum vs Removed region	-1.286	-2,239 to -0,3324	0.0073
Muscolaris Externa		Antrum	Corpus	Fundus	Removed Region
	Mean	1	8	3.5	5
	Std. Error of Mean	1	1.265	0.922	1
	Dunnett's multiple comparisons test	Mean Diff,	95,00% CI of diff,	Adjusted P Value
	Antrum vs Corpus	-7	-10,79 to -3,210	0.0004
	Antrum vs Fundus	-2.5	-6,290 to 1,290	0.2505
	Antrum vs Removed region	-4	-7,790 to -0,2104	0.0373
Sierosa		Antrum	Corpus	Fundus	Removed Region
	Mean	1	1.167	1	1.056
	Std. Error of Mean	0.1217	0.07454	0.2108	0.1024
	Dunnett's multiple comparisons test	Mean Diff,	95,00% CI of diff,	Adjusted P Value
	Antrum vs Corpus	-0.1667	-0,6597 to 0,3263	0.7268
	Antrum vs Fundus	0	-0,4930 to 0,4930	>0,9999
	Antrum vs Removed region	-0.05556	-0,5485 to 0,4374	0.9837
Histology Score		Antrum	Corpus	Fundus	Removed Region
	Mean	1	1.789	1.553	1.895
	Std. Error of Mean	0.07807	0.09705	0.1701	0.1525
	Dunnett's multiple comparisons test	Mean Diff,	95,00% CI of diff,	Adjusted P Value
	Antrum vs Corpus	-0.7895	-1,257 to -0,3220	0.001
	Antrum vs Fundus	-0.5526	-1,020 to -0,08511	0.0187
	Antrum vs Removed region	-0.8947	-1,362 to -0,4272	0.0003
