# Supplementary material for: Single Snapshot Imaging of Optical Properties (SSOP) for Perfusion Assessment during Gastric Conduit Creation for Esophagectomy: An Experimental Study on Pigs
Source: Cancers (Basel). 2021 Dec 2;13(23):6079. doi: 10.3390/cancers13236079 (PMC8656795; doi:10.3390/cancers13236079)
Supplement: Supplementary file 1 [file cancers-13-06079-s001.zip › Table S3.xlsx]

## Sheet: Sheet1
Capillary Lactates Antrum (mmol/L)		T0	T15	T30	T45	T60
	Mean	1	0.9529	1.059	1.247	1.024
	Std. Error of Mean	0.1871	0.2409	0.1514	0.1706	0.1952
	Dunnett's multiple comparisons test	Mean Diff,	95,00% CI of diff,	Adjusted P Value
	0 vs. 15	0.04706	-0,1956 to 0,2897	0.8969
	0 vs. 30	-0.05882	-0,5673 to 0,4497	0.9801
	0 vs. 45	-0.2471	-0,5064 to 0,01224	0.0594
	0 vs. 60	-0.02353	-1,193 to 1,146	>0,9999
Capillary Lactates Corpus (mmol/L)		T0	T15	T30	T45	T60
	Mean	1	1.536	1	0.9524	1.143
	Std. Error of Mean	0.2803	0.1842	0.2143	0.194	0.1223
	Dunnett's multiple comparisons test	Mean Diff,	95,00% CI of diff,	Adjusted P Value
	0 vs. 15	-0.5357	-1,006 to -0,06569	0.0307
	0 vs. 30	0	-0,6663 to 0,6663	>0,9999
	0 vs. 45	0.04762	-0,5388 to 0,6340	0.9946
	0 vs. 60	-0.1429	-1,200 to 0,9145	0.9662
Capillary Lactates Fundus (mmol/L)		T0	T15	T30	T45	T60
	Mean	1	1.284	1.558	1.368	1.526
	Std. Error of Mean	0.2371	0.254	0.221	0.2246	0.2232
	Dunnett's multiple comparisons test	Mean Diff,	95,00% CI of diff,	Adjusted P Value
	0 vs. 15	-0.2842	-1,194 to 0,6259	0.3272
	0 vs. 30	-0.5579	-1,151 to 0,03507	0.0651
	0 vs. 45	-0.3684	-0,8736 to 0,1368	0.1017
	0 vs. 60	-0.5263	-0,9961 to -0,05657	0.0451
Capillary Lactates Removed Region (mmol/L)		T0	T15	T30	T45	T60
	Mean	1	5.309	6.444	6.914	9.111
	Std. Error of Mean	0.2204	0.8863	0.5596	0.6868	0.7617
	Dunnett's multiple comparisons test	Mean Diff,	95,00% CI of diff,	Adjusted P Value
	0 vs. 15	-4.309	-6,370 to -2,247	<0,0001
	0 vs. 30	-5.444	-7,506 to -3,383	<0,0001
	0 vs. 45	-5.914	-7,975 to -3,852	<0,0001
	0 vs. 60	-8.111	-10,17 to -6,050	<0,0001
Multiple comparisons ANTRUM vs other ROIs
	Dunnett's multiple comparisons test	Mean Diff,	95,00% CI of diff,	Adjusted P Value
T0	Antrum vs. Corpus	0.01159	-0,9192 to 0,9424	>0,9999
	Antrum vs. Fundus	-0.1159	-1,015 to 0,7831	0.9674
	Antrum vs. Removed Region	0.04638	-0,7201 to 0,8129	0.9965
T15	Antrum vs. Corpus	-0.5565	-1,388 to 0,2750	0.2111
	Antrum vs. Fundus	-0.4754	-1,492 to 0,5417	0.4603
	Antrum vs. Removed Region	-4.046	-6,756 to -1,337	0.0091
T30	Antrum vs. Corpus	0.06957	-0,6510 to 0,7901	0.9856
	Antrum vs. Fundus	-0.6725	-1,488 to 0,1435	0.1068
	Antrum vs. Removed Region	-5.009	-6,719 to -3,298	0.0003
T45	Antrum vs. Corpus	0.3014	-0,3981 to 1,001	0.5205
	Antrum vs. Fundus	-0.2783	-1,123 to 0,5663	0.6864
	Antrum vs. Removed Region	-5.264	-7,365 to -3,162	0.0007
T60	Antrum vs. Corpus	-0.1043	-0,7503 to 0,5416	0.9375
	Antrum vs. Fundus	-0.6725	-1,542 to 0,1975	0.1367
	Antrum vs. Removed Region	-7.548	-9,878 to -5,218	0.0002
Multiple comparisons CORPUS vs other ROIs
	Dunnett's multiple comparisons test	Mean Diff,	95,00% CI of diff,	Adjusted P Value
T0	Corpus vs. Antrum	-0.01159	-0,9424 to 0,9192	>0,9999
	Corpus vs. Fundus	-0.1275	-1,170 to 0,9152	0.9734
	Corpus vs. Removed Region	0.03478	-0,9222 to 0,9917	0.9992
T15	Corpus vs. Antrum	0.5565	-0,2750 to 1,388	0.2111
	Corpus vs. Fundus	0.08116	-0,8635 to 1,026	0.9894
	Corpus vs. Removed Region	-3.49	-6,208 to -0,7715	0.0186
T30	Corpus vs. Antrum	-0.06957	-0,7901 to 0,6510	0.9856
	Corpus vs. Fundus	-0.742	-1,630 to 0,1461	0.1046
	Corpus vs. Removed Region	-5.078	-6,788 to -3,368	0.0002
T45	Corpus vs. Antrum	-0.3014	-1,001 to 0,3981	0.5205
	Corpus vs. Fundus	-0.5797	-1,449 to 0,2893	0.2132
	Corpus vs. Removed Region	-5.565	-7,664 to -3,466	0.0005
T60	Corpus vs. Antrum	0.1043	-0,5416 to 0,7503	0.9375
	Corpus vs. Fundus	-0.5681	-1,374 to 0,2373	0.1699
	Corpus vs. Removed Region	-7.443	-9,786 to -5,101	0.0003
Multiple comparisons FUNDUS vs other ROIs
	Dunnett's multiple comparisons test	Mean Diff,	95,00% CI of diff,	Adjusted P Value
T0	Fundus vs. Antrum	0.1159	-0,7831 to 1,015	0.9674
	Fundus vs. Corpus	0.1275	-0,9152 to 1,170	0.9734
	Fundus vs. Removed Region	0.1623	-0,7652 to 1,090	0.9281
T15	Fundus vs. Antrum	0.4754	-0,5417 to 1,492	0.4603
	Fundus vs. Corpus	-0.08116	-1,026 to 0,8635	0.9894
	Fundus vs. Removed Region	-3.571	-6,277 to -0,8646	0.0155
T30	Fundus vs. Antrum	0.6725	-0,1435 to 1,488	0.1068
	Fundus vs. Corpus	0.742	-0,1461 to 1,630	0.1046
	Fundus vs. Removed Region	-4.336	-6,054 to -2,619	0.0004
T45	Fundus vs. Antrum	0.2783	-0,5663 to 1,123	0.6864
	Fundus vs. Corpus	0.5797	-0,2893 to 1,449	0.2132
	Fundus vs. Removed Region	-4.986	-7,084 to -2,887	0.0007
T60	Fundus vs. Antrum	0.6725	-0,1975 to 1,542	0.1367
	Fundus vs. Corpus	0.5681	-0,2373 to 1,374	0.1699
	Fundus vs. Removed Region	-6.875	-9,201 to -4,550	0.0002
Multiple comparisons REMOVED REGION vs other ROIs
	Dunnett's multiple comparisons test	Mean Diff,	95,00% CI of diff,	Adjusted P Value
T0	Removed Region vs. Antrum	-0.04638	-0,8129 to 0,7201	0.9965
	Removed Region vs. Corpus	-0.03478	-0,9917 to 0,9222	0.9992
	Removed Region vs. Fundus	-0.1623	-1,090 to 0,7652	0.9281
T15	Removed Region vs. Antrum	4.046	1,337 to 6,756	0.0091
	Removed Region vs. Corpus	3.49	0,7715 to 6,208	0.0186
	Removed Region vs. Fundus	3.571	0,8646 to 6,277	0.0155
T30	Removed Region vs. Antrum	5.009	3,298 to 6,719	0.0003
	Removed Region vs. Corpus	5.078	3,368 to 6,788	0.0002
	Removed Region vs. Fundus	4.336	2,619 to 6,054	0.0004
T45	Removed Region vs. Antrum	5.264	3,162 to 7,365	0.0007
	Removed Region vs. Corpus	5.565	3,466 to 7,664	0.0005
	Removed Region vs. Fundus	4.986	2,887 to 7,084	0.0007
T60	Removed Region vs. Antrum	7.548	5,218 to 9,878	0.0002
	Removed Region vs. Corpus	7.443	5,101 to 9,786	0.0003
	Removed Region vs. Fundus	6.875	4,550 to 9,201	0.0002
