# Supplementary material for: Single Snapshot Imaging of Optical Properties (SSOP) for Perfusion Assessment during Gastric Conduit Creation for Esophagectomy: An Experimental Study on Pigs
Source: Cancers (Basel). 2021 Dec 2;13(23):6079. doi: 10.3390/cancers13236079 (PMC8656795; doi:10.3390/cancers13236079)
Supplement: Supplementary file 1 [file cancers-13-06079-s001.zip › Table S4.xlsx]

## Sheet: Sheet1
StO2% Antrum		T0	T15	T30	T45	T60
	Mean	1	0.9286	0.9446	0.9428	0.9443
	Std. Error of Mean	0.0158	0.04619	0.03174	0.04657	0.0337
	Dunnett's multiple comparisons test	Mean Diff,	95,00% CI of diff,	Adjusted P Value
	0 vs. 15	0.07144	-0,01151 to 0,1544	0.104
	0 vs. 30	0.05537	-0,02758 to 0,1383	0.2597
	0 vs. 45	0.05724	-0,02570 to 0,1402	0.2353
	0 vs. 60	0.05567	-0,02728 to 0,1386	0.2557
StO2% Corpus		T0	T15	T30	T45	T60
	Mean	1	1.025	1.076	1.082	1.125
	Std. Error of Mean	0.02959	0.02975	0.01433	0.01323	0.005792
	Dunnett's multiple comparisons test	Mean Diff,	95,00% CI of diff,	Adjusted P Value
	0 vs. 15	-0.0246	-0,1015 to 0,05229	0.8194
	0 vs. 30	-0.07605	-0,1529 to 0,0008453	0.0532
	0 vs. 45	-0.08229	-0,1592 to -0,005401	0.0334
	0 vs. 60	-0.1249	-0,2018 to -0,04798	0.001
StO2% Fundus		T0	T15	T30	T45	T60
	Mean	1	1.129	1.105	1.095	1.111
	Std. Error of Mean	0.0298	0.02272	0.02347	0.01573	0.01368
	Dunnett's multiple comparisons test	Mean Diff,	95,00% CI of diff,	Adjusted P Value
	0 vs. 15	-0.1288	-0,2094 to -0,04817	0.0012
	0 vs. 30	-0.1051	-0,1857 to -0,02449	0.008
	0 vs. 45	-0.09455	-0,1752 to -0,01395	0.0181
	0 vs. 60	-0.1114	-0,1920 to -0,03079	0.0049
StO2% Removed Region		T0	T15	T30	T45	T60
	Mean	1	0.6205	0.5817	0.5639	0.5712
	Std. Error of Mean	0.04407	0.02635	0.02125	0.02529	0.04417
	Dunnett's multiple comparisons test	Mean Diff,	95,00% CI of diff,	Adjusted P Value
	0 vs. 15	0.3795	0,2552 to 0,5037	<0,0001
	0 vs. 30	0.4183	0,2941 to 0,5426	<0,0001
	0 vs. 45	0.4361	0,3118 to 0,5603	<0,0001
	0 vs. 60	0.4288	0,3046 to 0,5531	<0,0001
Multiple comparisons ANTRUM vs other ROIs
	Dunnett's multiple comparisons test	Mean Diff,	95,00% CI of diff,	Adjusted P Value
T0	Antrum vs. Corpus	-0.062	-0,1591 to 0,03515	0.2996
	Antrum vs. Fundus	-0.07479	-0,1719 to 0,02236	0.1686
	Antrum vs. Removed Region	-0.0561	-0,1532 to 0,04105	0.3784
T15	Antrum vs. Corpus	-0.1549	-0,2521 to -0,05778	0.0007
	Antrum vs. Fundus	-0.275	-0,3721 to -0,1778	<0,0001
	Antrum vs. Removed Region	0.2584	0,1612 to 0,3555	<0,0001
T30	Antrum vs. Corpus	-0.1918	-0,2889 to -0,09464	<0,0001
	Antrum vs. Fundus	-0.2354	-0,3325 to -0,1382	<0,0001
	Antrum vs. Removed Region	0.3128	0,2157 to 0,4100	<0,0001
T45	Antrum vs. Corpus	-0.1999	-0,2971 to -0,1028	<0,0001
	Antrum vs. Fundus	-0.2263	-0,3235 to -0,1292	<0,0001
	Antrum vs. Removed Region	0.3289	0,2318 to 0,4261	<0,0001
T60	Antrum vs. Corpus	-0.2416	-0,3387 to -0,1444	<0,0001
	Antrum vs. Fundus	-0.2421	-0,3393 to -0,1450	<0,0001
	Antrum vs. Removed Region	0.3231	0,2260 to 0,4203	<0,0001
Multiple comparisons CORPUS vs other ROIs
	Dunnett's multiple comparisons test	Mean Diff,	95,00% CI of diff,	Adjusted P Value
T0	Corpus vs. Antrum	0.062	-0,03515 to 0,1591	0.2996
	Corpus vs. Fundus	-0.01279	-0,1099 to 0,08436	0.9792
	Corpus vs. Removed Region	0.005903	-0,09125 to 0,1031	0.9979
T15	Corpus vs. Antrum	0.1549	0,05778 to 0,2521	0.0007
	Corpus vs. Fundus	-0.12	-0,2172 to -0,02289	0.0111
	Corpus vs. Removed Region	0.4133	0,3162 to 0,5105	<0,0001
T30	Corpus vs. Antrum	0.1918	0,09464 to 0,2889	<0,0001
	Corpus vs. Fundus	-0.04358	-0,1407 to 0,05357	0.5771
	Corpus vs. Removed Region	0.5046	0,4075 to 0,6018	<0,0001
T45	Corpus vs. Antrum	0.1999	0,1028 to 0,2971	<0,0001
	Corpus vs. Fundus	-0.02643	-0,1236 to 0,07072	0.854
	Corpus vs. Removed Region	0.5288	0,4317 to 0,6260	<0,0001
T60	Corpus vs. Antrum	0.2416	0,1444 to 0,3387	<0,0001
	Corpus vs. Fundus	-0.0005538	-0,09770 to 0,09660	>0,9999
	Corpus vs. Removed Region	0.5647	0,4676 to 0,6619	<0,0001
Multiple comparisons FUNDUS vs other ROIs
	Dunnett's multiple comparisons test	Mean Diff,	95,00% CI of diff,	Adjusted P Value
T0	Fundus vs. Antrum	0.07479	-0,02236 to 0,1719	0.1686
	Fundus vs. Corpus	0.01279	-0,08436 to 0,1099	0.9792
	Fundus vs. Removed Region	0.01869	-0,07846 to 0,1158	0.9402
T15	Fundus vs. Antrum	0.275	0,1778 to 0,3721	<0,0001
	Fundus vs. Corpus	0.12	0,02289 to 0,2172	0.0111
	Fundus vs. Removed Region	0.5334	0,4362 to 0,6305	<0,0001
T30	Fundus vs. Antrum	0.2354	0,1382 to 0,3325	<0,0001
	Fundus vs. Corpus	0.04358	-0,05357 to 0,1407	0.5771
	Fundus vs. Removed Region	0.5482	0,4510 to 0,6453	<0,0001
T45	Fundus vs. Antrum	0.2263	0,1292 to 0,3235	<0,0001
	Fundus vs. Corpus	0.02643	-0,07072 to 0,1236	0.854
	Fundus vs. Removed Region	0.5553	0,4581 to 0,6524	<0,0001
T60	Fundus vs. Antrum	0.2421	0,1450 to 0,3393	<0,0001
	Fundus vs. Corpus	0.0005538	-0,09660 to 0,09770	>0,9999
	Fundus vs. Removed Region	0.5653	0,4681 to 0,6624	<0,0001
Multiple comparisons REMOVED REGION vs other ROIs
	Dunnett's multiple comparisons test	Mean Diff,	95,00% CI of diff,	Adjusted P Value
T0	Removed Region vs. Antrum	0.0561	-0,04105 to 0,1532	0.3784
	Removed Region vs. Corpus	-0.005903	-0,1031 to 0,09125	0.9979
	Removed Region vs. Fundus	-0.01869	-0,1158 to 0,07846	0.9402
T15	Removed Region vs. Antrum	-0.2584	-0,3555 to -0,1612	<0,0001
	Removed Region vs. Corpus	-0.4133	-0,5105 to -0,3162	<0,0001
	Removed Region vs. Fundus	-0.5334	-0,6305 to -0,4362	<0,0001
T30	Removed Region vs. Antrum	-0.3128	-0,4100 to -0,2157	<0,0001
	Removed Region vs. Corpus	-0.5046	-0,6018 to -0,4075	<0,0001
	Removed Region vs. Fundus	-0.5482	-0,6453 to -0,4510	<0,0001
T45	Removed Region vs. Antrum	-0.3289	-0,4261 to -0,2318	<0,0001
	Removed Region vs. Corpus	-0.5288	-0,6260 to -0,4317	<0,0001
	Removed Region vs. Fundus	-0.5553	-0,6524 to -0,4581	<0,0001
T60	Removed Region vs. Antrum	-0.3231	-0,4203 to -0,2260	<0,0001
	Removed Region vs. Corpus	-0.5647	-0,6619 to -0,4676	<0,0001
	Removed Region vs. Fundus	-0.5653	-0,6624 to -0,4681	<0,0001
